# Supplementary material for: Sustainable Operation Structures in the Cross-Border Enterprise Ecosystem under Tariff Fluctuations: A Systematic Evaluation
Source: MDPI journal article supplement (doi:10.3390/systems10060211), 2022-11-07
Supplement: s1 [file s1]

## System Dynamics Model Equations

### Content Overview

1. SD Equations for “No Distributor” Model
  - Stock equations
  - Flow equations
  - Converters
  - Constants
2. SD Equations for “Commissionaire” Model
  - Stock equations
  - Flow equations
  - Converters
  - Constants
3. SD Equations for “Fully-Fledged Distributor with Fixed Transfer Coefficient” Model
  - Stock equations
  - Flow equations
  - Converters
  - Constants
4. SD Equations for “Fully-Fledged Distributor with Fixed Transfer Price” Model
  - Stock equations
  - Flow equations
  - Converters
  - Constants

### Content

#### 1. SD Equations for “No Distributor” Model

*Stock equations:*

- (1) Customs= INTEG (Shipment-Customs Clearance, 0) [Unit]
- (2) Inventory for Shipments in HQ Region= INTEG (Production-Shipment, 1500) [Unit]
- (3) Production Total Volume= INTEG (Production, 0) [Unit]
- (4) Profit= INTEG (Revenue-Cost, 5000) [Dollar]
- (5) Sales Total Volume= INTEG (Customs Clearance, 0) [Unit]

*Flow equations:*

- (1) Cost=Unit Production Cost\*Production + Fixed Cost for HQ + Shipment Cost + Sales Cost +HQ Export tax [Dollar/Month]
- (2) Customs Clearance=DELAY1(IF THEN ELSE(Customs>0, Customs/Period B,0), Declaration Lead Time ) [Unit/Month]
- (3) Production=DELAY1( IF THEN ELSE(Target Production Volume>=Production Capacity, Production Capacity, Target Production Volume) , Production Lead Time ) [Unit/Month]
- (4) Revenue="Sales Price w/o Tariff"\*Customs Clearance [Dollar/Month]
- (5) Shipment=DELAY1(IF THEN ELSE((Inventory for Shipments in HQ Region/Period A)>=Order Quantity, Order Quantity, Inventory for Shipments in HQ Region/Period A),Shipment Lead Time) [Unit/Month]

*Converters:*

- (1) Demand Reverse Effect on Price= $(\text{Unit Adjustment} \times 500 / \text{Inventory for Shipments in HQ Region})^{(1/6)} \times 100$  [Dmnl]
- (2) HQ Export tax="Sales Price w/o Tariff"\*Shipment\*HQ Export tax Rate  
Units: dollar/Month
- (3) Order Quantity= $(\text{Unit Adjustment II} \times 100 / \text{Sales Price w Tariff})^6 \times 500 \times \text{Sales Effort} \times \text{Volume Coefficient}$  [Unit/Month]
- (4) Price Value=Demand Reverse Effect on Price [Dmnl]
- (5) Sales Effort=Sales Cost/Sales Coefficient [Dmnl]
- (6) Sales Price w Tariff=Price Value\*Price Unit Reference [Dollar/Unit]
- (7) "Sales Price w/o Tariff"=Sales Price w Tariff/(1+Tariff Rate) [Dollar/Unit]
- (8) Shipment Cost=Order Quantity\*Shipment Cost per Order [Dollar/Month]
- (9) Target Production Volume=  $((1 - \text{HQ Export tax Rate}) \times (1 - 1/\text{Elasticity Coefficient}) / (1 + \text{Tariff Rate}) / (\text{Unit Production Cost} + \text{Shipment Cost per Order}) / \text{Unit Coefficient})^{\text{Elasticity Coefficient}} \times \text{Nonlinear Demand Coefficient} \times \text{Volume Coefficient}$  [Unit/Month]

*Constants:*

- (1) Declaration Lead Time=0.5 [Month]
- (2) Elasticity Coefficient=6 [Dmnl]
- (3) FINAL TIME = 100 [Month]  
The final time for the simulation.
- (4) Fixed Cost for HQ=10000 [Dollar/Month]
- (5) HQ Export tax Rate=-0.02 [Dmnl]
- (6) INITIAL TIME = 0 [Month]  
The initial time for the simulation.
- (7) Nonlinear Demand Coefficient= $100^6 \times 500$  [Dmnl]
- (8) Period A=1 [Month]
- (9) Period B=1 [Month]
- (10) Price Unit Reference=1 [Dollar/Unit]
- (11) Production Capacity= $1 \times 10^9$  [Unit/Month]
- (12) Production Lead Time=0.5 [Month]
- (13) Sales Coefficient=10000 [Dollar/Month]
- (14) Sales Cost=8000 [Dollar/Month]
- (15) SAVEPER = TIME STEP [Month]  
The frequency with which output is stored.
- (16) Shipment Cost per Order=10 [Dollar/Unit]
- (17) Shipment Lead Time=0.5 [Month]
- (18) Tariff Rate=0.3 [Dmnl]
- (19) TIME STEP = 1 [Month]  
The time step for the simulation.
- (20) Unit Adjustment=1 [Unit]
- (21) Unit Adjustment II=1 [Dollar/Unit]
- (22) Unit Coefficient=1 [Unit/Dollar]
- (23) Unit Production Cost=13 [Dollar/Unit]

(24) Volume Coefficient=1 [Unit/Month]

## 2. SD Equations for “Commissionaire” Model

*Stock equations:*

- (1) Bonded Inventory in Distributor Region= INTEG (Shipments-Customs Clearance, 1000) [Unit]
- (2) Distributor Profit= INTEG (Distributor Revenue-Distributor Cost, 0) [Dollar]
- (3) HQ Profit= INTEG (HQ Revenue-HQ Cost, 0) [Dollar]
- (4) Inventory for Shipments in HQ Region= INTEG (Production-Shipments, 1500) [Unit]
- (5) Production Total Volume= INTEG (Production, 0) [Unit]
- (6) Profit= INTEG (Revenue-Cost, 5000) [Dollar]
- (7) Sales Total Volume= INTEG (Sales, 0) [Unit]
- (8) Unbonded Inventory in Distributor Region= INTEG (Customs Clearance-Sales, 1000) [Unit]

*Flow equations:*

- (1) Cost=Unit Production Cost\*Production + Fixed Cost for HQ + Shipment Cost + Operation Cost for Bonded Inventory + Operation Cost for Unbonded Inventory + Sales Labor Cost + HQ Export tax + Distributor Local Tax + Tariff + Sales Unit Cost\*Sales [Dollar/Month]
- (2) Customs Clearance=DELAY1(IF THEN ELSE((Bonded Inventory in Distributor Region/Cover Time)>Target Customs Declaration Volume, Target Customs Declaration Volume, Bonded Inventory in Distributor Region/Cover Time) , Lead Time for Declaration ) [Unit/Month]
- (3) Distributor Cost=Shipments\*Transfer Price + Operation Cost for Bonded Inventory + Operation Cost for Unbonded Inventory+ Distributor Local Tax + Sales Labor Cost + Shipment Cost + Tariff + Sales Unit Cost\*Sales [Dollar/Month]
- (4) Distributor Revenue=Sales\*Sales Price w Tariff [Dollar/Month]
- (5) HQ Cost=Unit Production Cost\*Production + Fixed Cost for HQ + HQ Export tax [Dollar/Month]
- (6) HQ Revenue=Transfer Price\*Shipments [Dollar/Month]
- (7) Production=DELAY1( IF THEN ELSE(Target Production Volume>=Production Capacity, Production Capacity, Target Production Volume) , Production Lead Time ) [Unit/Month]
- (8) Revenue=Sales\*Sales Price w Tariff [Dollar/Month]
- (9) Sales=DELAY1((Unit Adjustment II\*100/Sales Price w Tariff)^6\*500\*Distributor Sales Efforts\*Volume Coefficient, Sales Lead Time ) [Unit/Month]
- (10) Shipments=DELAY1(IF THEN ELSE((Inventory for Shipments in HQ Region/Period)>=Shipment Capacity, Shipment Capacity, Inventory for Shipments in HQ Region/Period ) , Shipment Lead Time) [Unit/Month]

*Converters:*

- (1) Demand Reverse Effect on Price=(Unit Adjustment\*500/(Bonded Inventory in Distributor Region + Inventory for Shipments in HQ Region + Unbonded Inventory in Distributor Region))^(1/6)\*100 [Dmnl]
- (2) Distributor Local Tax=Sales Price w Tariff\*Sales\*Distributor Local Tax Rate [Dollar/Month]
- (3) Distributor Sales Efforts=Distributor Contract/Contract Coefficient [Dmnl]
- (4) HQ Export tax=Transfer Price\*Shipments\*HQ Export tax Rate [Dollar/Month]

- (5) Price Value=Demand Reverse Effect on Price [Dmnl]
- (6) Sales Labor Cost=Distributor Contract [Dollar/Month]
- (7) Sales Price w Tariff=Price Value\*Price Unit Reference [Dollar/Unit]
- (8) "Sales Price w/o Tariff"=Sales Price w Tariff/(1+Tariff Rate) [Dollar/Unit]
- (9) Target Customs Declaration Volume=IF THEN ELSE((Unbonded Inventory in Distributor Region/Cover Time)>2\*Sales, 0, 2\*Sales-Unbonded Inventory in Distributor Region/Cover Time) [Unit/Month]
- (10) Target Production Volume= (Unit coefficient\*(1-Distributor Local Tax Rate)\*(1-1/Elasticity Coefficient)/(Unit Production Cost + Sales Unit Cost + Transfer Price\*HQ Export tax Rate + Transfer Price\*Tariff Rate))^Elasticity Coefficient\*Nonlinear Demand Coefficient\*Volume Coefficient [Unit/Month]
- (11) Tariff=Customs Clearance\*Tariff Rate\*Transfer Price [Dollar/Month]
- (12) Transfer Price="Sales Price w/o Tariff"\*Transfer Coefficient [Dollar/Unit]

*Constants:*

- (1) Contract Coefficient=10000 [Dollar/Month]
- (2) Cover Time=1 [Month]
- (3) Distributor Contract=9000 [Dollar/Month]
- (4) Distributor Local Tax Rate=0.18 [Dmnl]
- (5) Elasticity Coefficient=6 [Dmnl]
- (6) FINAL TIME = 100 [Month]  
The final time for the simulation.
- (7) Fixed Cost for Distributor=1000 [Dollar/Month]
- (8) Fixed Cost for HQ=9000 [Dollar/Month]
- (9) HQ Export tax Rate=-0.02 [Dmnl]
- (10) INITIAL TIME=0 [Month]  
The initial time for the simulation.
- (11) Lead Time for Declaration=0.5 [Month]
- (12) Nonlinear Demand Coefficient=100^6\*500 [Dmnl]
- (13) Operation Cost for Bonded Inventory=1000 [Dollar/Month]
- (14) Operation Cost for Unbonded Inventory=800 [Dollar/Month]
- (15) Period=2 [Month]
- (16) Price Unit Reference=1 [Dollar/Unit]
- (17) Production Capacity=1e+09 [Unit/Month]
- (18) Production Lead Time=0.5 [Month]
- (19) Sales Lead Time=0.5 [Month]
- (20) Sales Unit Cost=3 [Dollar/Unit]
- (21) SAVEPER = TIME STEP [Month]  
The frequency with which output is stored.
- (22) Shipment Capacity=1e+09 [Unit/Month]
- (23) Shipment Cost=1000 [Dollar/Month]
- (24) Shipment Lead Time=0.5 [Month]
- (25) Tariff Rate=0.3 [Dmnl]
- (26) TIME STEP=1 [Month]

The time step for the simulation.

- (27) Transfer Coefficient=0.6 [Dmn]
- (28) Unit Adjustment=1 [Unit]
- (29) Unit Adjustment II=1 [Dollar/Unit]
- (30) Unit coefficient=1 [Dollar/Unit]
- (31) Unit Production Cost=13 [Dollar/Unit]
- (32) Volume Coefficient=1 [Unit/Month]

### 3. SD Equations for “Fully-Fledged Distributor with Fixed Transfer Coefficient” Model

*Stock equations:*

- (1) Bonded Inventory in Distributor Region= INTEG (Shipments-Customs Clearance, 1000) [Unit]
- (2) Distributor Profit= INTEG (Distributor Revenue-Distributor Cost, 0) [Dollar]
- (3) HQ Profit= INTEG (HQ Revenue-HQ Cost, 0) [Dollar]
- (4) Inventory for Shipments in HQ Region= INTEG (Production-Shipments, 1500) [Unit]
- (5) Production Total Volume= INTEG (Production, 0) [Unit]
- (6) Profit= INTEG (Revenue-Cost, 5000) [Dollar]
- (7) Sales Total Volume= INTEG (Sales, 0) [Unit]
- (8) Unbonded Inventory in Distributor Region= INTEG (Customs Clearance-Sales, 1000) [Unit]

*Flow equations:*

- (1) Cost=Unit Production Cost\*Sales + Fixed Cost for HQ + Shipment Cost + Operation Cost for Bonded Inventory + Operation Cost for Unbonded Inventory +Sales Labor Cost + HQ Export tax + Distributor Local Tax + Tariff + Sales Unit Cost\*Sales [Dollar/Month]
- (2) Customs Clearance=DELAY1(IF THEN ELSE((Bonded Inventory in Distributor Region/Cover Time)>Target Customs Declaration Volume, Target Customs Declaration Volume, Bonded Inventory in Distributor Region/Cover Time) , Lead Time for Declaration) [Unit/Month]
- (3) Distributor Cost=Shipments\*Transfer Price + Operation Cost for Bonded Inventory + Operation Cost for Unbonded Inventory + Distributor Local Tax + Sales Labour Cost+Shipment Cost + Tariff + Sales Unit Cost\*Sales [Dollar/Month]
- (4) Distributor Revenue=Sales\*Sales Price w Tariff [Dollar/Month]
- (5) HQ Cost=Unit Production Cost\*Shipments + Fixed Cost for HQ + HQ Export tax [Dollar/Month]
- (6) Production=DELAY1( IF THEN ELSE(Target Production Volume>=Production Capacity, Production Capacity, Target Production Volume) , Production Lead Time) [Unit/Month]
- (7) Revenue=Sales\*Sales Price w Tariff [Dollar/Month]
- (8) Sales=DELAY1((Unit Adjustment II\*100/Sales Price w Tariff)^6\*500\*Distributor Sales Efforts\*Volume Coefficient, Sales Lead Time ) [Unit/Month]
- (9) Shipments=DELAY1( IF THEN ELSE((Inventory for Shipments in HQ Region/Period)>=Shipment Capacity, Shipment Capacity , Inventory for Shipments in HQ Region/Period ) , Shipment Lead Time) [Unit/Month]

*Converters:*

- (1) Demand Reverse Effect on Price=(Unit Adjustment\*500/(Bonded Inventory in Distributor

- Region + Inventory for Shipments in HQ Region + Unbonded Inventory in Distributor Region))^(1/6)\*100 [Dmnl]
- (2) Distributor Local Tax=Sales Price w Tariff\*Sales\*Distributor Local Tax Rate [Dollar/Month]
  - (3) Distributor Sales Efforts=Distributor Contract/Contract Coefficient [Dmnl]
  - (4) HQ Export tax=Transfer Price\*Shipments\*HQ Export tax Rate [Dollar/Month]
  - (5) HQ Revenue=Transfer Price\*Shipments [Dollar/Month]
  - (6) Order Volume=(Unit coefficient\*(1-Distributor Local Tax Rate)\*(1-1/Elasticity Coefficient)/(Sales Unit Cost + Transfer Price + Transfer Price\*Tariff Rate))^Elasticity Coefficient\*Nonlinear Demand Coefficient\*Volume Coefficient [Unit/Month]
  - (7) Price Value=Demand Reverse Effect on Price [Dmnl]
  - (8) Sales Labor Cost=Distributor Contract [Dollar/Month]
  - (9) Sales Price w Tariff=Price Value\*Price Unit Reference [Dollar/Unit]
  - (10) "Sales Price w/o Tariff"=Sales Price w Tariff/(1+Tariff Rate) [Dollar/Unit]
  - (11) Target Customs Declaration Volume=IF THEN ELSE(Unbonded Inventory in Distributor Region/Cover Time>2\*Sales, 0, 2\*Sales-Unbonded Inventory in Distributor Region/Cover Time ) [Unit/Month]
  - (12) Target Production Volume=Order Volume [Unit/Month]
  - (13) Tariff=Customs Clearance\*Tariff Rate\*Transfer Price [Dollar/Month]
  - (14) Transfer Price="Sales Price w/o Tariff"\*Transfer Coefficient [Dollar/Unit]

*Constants:*

- (1) Contract Coefficient=10000 [Dollar/Month]
- (2) Cover Time=1 [Month]
- (3) Distributor Contract=10000 [Dollar/Month]
- (4) Distributor Local Tax Rate=0.18 [Dmnl]
- (5) Elasticity Coefficient=6 [Dmnl]
- (6) FINAL TIME=100 [Month]  
The final time for the simulation.
- (7) Fixed Cost for Distributor=1000, [Dollar/Month]
- (8) Fixed Cost for HQ=9000 [Dollar/Month]
- (9) HQ Export tax Rate=-0.02 [Dmnl]
- (10) INITIAL TIME=0 [Month]  
The initial time for the simulation.
- (11) Lead Time for Declaration=0.5 [Month]
- (12) Nonlinear Demand Coefficient=100^6\*500 [Dmnl]
- (13) Operation Cost for Bonded Inventory=1000 [Dollar/Month]
- (14) Operation Cost for Unbonded Inventory=800 [Dollar/Month]
- (15) Period=1 [Month]
- (16) Price Unit Reference=1 [Dollar/Unit]
- (17) Production Capacity=1e+09 [Unit/Month]
- (18) Production Lead Time=0.5 [Month]
- (19) Sales Lead Time=0.5 [Month]
- (20) Sales Unit Cost=3 [Dollar/Unit]
- (21) SAVEPER = TIME STEP [Month]

The frequency with which output is stored.

- (22) Shipment Capacity=1e+09 [Unit/Month]
- (23) Shipment Cost=1000 [Dollar/Month]
- (24) Shipment Lead Time=0.5 [Month]
- (25) Tariff Rate=0.3 [Dmnl]
- (26) TIME STEP=1 [Month]

The time step for the simulation.

- (27) Transfer Coefficient=0.6 [Dmnl]
- (28) Unit Adjustment=1 [Unit]
- (29) Unit Adjustment II=1 [Dollar/Unit]
- (30) Unit coefficient=1 [Dollar/Unit]
- (31) Unit Production Cost=13 [Dollar/Unit]
- (32) Volume Coefficient=1 [Unit/Month]

#### 4. SD Equations for “Fully-Fledged Distributor with Fixed Transfer Price” Model

*Stock equations:*

- (1) Bonded Inventory in Distributor Region= INTEG (Shipments-Customs Clearance, 1000) [Unit]
- (2) Distributor Profit= INTEG (Distributor Revenue-Distributor Cost, 0) [Dollar]
- (3) HQ Profit= INTEG (HQ Revenue-HQ Cost, 0) [Dollar]
- (4) Inventory for Shipments in HQ Region= INTEG (Production-Shipments, 1500) [Unit]
- (5) Production Total Volume= INTEG (Production, 0) [Unit]
- (6) Profit= INTEG (Revenue-Cost, 5000) [Dollar]
- (7) Sales Total Volume= INTEG (Sales, 0) [Unit]
- (8) Unbonded Inventory in Distributor Region= INTEG (Customs Clearance-Sales, 1000) [Unit]

*Flow equations:*

- (1) Cost=Unit Production Cost\*Sales + Fixed Cost for HQ + Shipment Cost + Operation Cost for Bonded Inventory + Operation Cost for Unbonded Inventory + Sales Labor Cost + HQ Export tax + Distributor Local Tax + Tariff + Sales Unit Cost\*Sales [Dollar/Month]
- (2) Customs Clearance=DELAY1( IF THEN ELSE((Bonded Inventory in Distributor Region/Cover Time)>Target Customs Declaration Volume, Target Customs Declaration Volume, Bonded Inventory in Distributor Region/Cover Time) , Lead Time for Declaration) [Unit/Month]
- (3) Distributor Cost=Shipments\*Transfer Price + Operation Cost for Bonded Inventory + Operation Cost for Unbonded Inventory + Distributor Local Tax + Sales Labor Cost + Shipment Cost + Tariff + Sales Unit Cost\*Sales [Dollar/Month]
- (4) Distributor Revenue=Sales\*Sales Price w Tariff [Dollar/Month]
- (5) HQ Cost=Unit Production Cost\*Shipments + Fixed Cost for HQ + HQ Export tax [Dollar/Month]
- (6) HQ Revenue=Transfer Price\*Shipments [Dollar/Month]
- (7) Production=DELAY1( IF THEN ELSE(Target Production Volume>=Production Capacity, Production Capacity, Target Production Volume), Production Lead Time) [Unit/Month]
- (8) Revenue=Sales\*Sales Price w Tariff [Dollar/Month]
- (9) Sales=DELAY1((Unit Adjustment II\*100/Sales Price w Tariff)^6\*500\*Distributor Sales

Efforts\*Volume Coefficient, Sales Lead Time ) [Unit/Month]

- (10) Shipments=DELAY1(IF THEN ELSE((Inventory for Shipments in HQ Region/Period)>=Shipment Capacity, Shipment Capacity , Inventory for Shipments in HQ Region/Period ) , Shipment Lead Time) [Unit/Month]

*Converters:*

- (1) Demand Reverse Effect on Price=(Unit Adjustment\*500/(Bonded Inventory in Distributor Region + Inventory for Shipments in HQ Region + Unbonded Inventory in Distributor Region))^(1/6)\*100 [Dmnl]
- (2) Distributor Local Tax=Sales Price w Tariff\*Sales\*Distributor Local Tax Rate [dollar/Month]
- (3) Distributor Sales Efforts=Distributor Contract/Contract Coefficient [Dmnl]
- (4) HQ Export tax=Transfer Price\*Shipments\*HQ Export tax Rate [Dollar/Month]
- (5) Order Volume=(Unit coefficient\*(1-Distributor Local Tax Rate)\*(1-1/Elasticity Coefficient)/(Sales Unit Cost + Transfer Price + Transfer Price\*Tariff Rate))^Elasticity Coefficient\*Nonlinear Demand Coefficient\*Volume Coefficient [Unit/Month]
- (6) Price Value=Demand Reverse Effect on Price [Dmnl]
- (7) Sales Labor Cost=Distributor Contract [Dollar/Month]
- (8) Sales Price w Tariff=Price Value\*Price Unit Reference [Dollar/Unit]
- (9) "Sales Price w/o Tariff"=Sales Price w Tariff/(1+Tariff Rate) [Dollar/Unit]
- (10) Target Customs Declaration Volume=IF THEN ELSE(Unbonded Inventory in Distributor Region/Cover Time>2\*Sales, 0, 2\*Sales-Unbonded Inventory in Distributor Region/Cover Time ) [Unit/Month]
- (11) Target Production Volume=Order Volume [Unit/Month]
- (12) Tariff=Customs Clearance\*Tariff Rate\*Transfer Price [Dollar/Month]

*Constants:*

- (1) Contract Coefficient=10000 [Dollar/Month]
- (2) Cover Time=1 [Month]
- (3) Distributor Contract=10000 [Dollar/Month]
- (4) Distributor Local Tax Rate=0.18 [Dmnl]
- (5) Elasticity Coefficient=6 [Dmnl]
- (6) FINAL TIME=100 [Month]  
The final time for the simulation.
- (7) Fixed Cost for Distributor=1000 [Dollar/Month]
- (8) Fixed Cost for HQ=9000 [Dollar/Month]
- (9) HQ Export tax Rate=-0.02 [Dmnl]
- (10) INITIAL TIME=0 [Month]  
The initial time for the simulation.
- (11) Lead Time for Declaration=0.5 [Month]
- (12) Nonlinear Demand Coefficient=100^6\*500 [Dmnl]
- (13) Operation Cost for Bonded Inventory=1000 [Dollar/Month]
- (14) Operation Cost for Unbonded Inventory=800 [Dollar/Month]
- (15) Period=1 [Month]
- (16) Price Unit Reference=1 [Dollar/Unit]



(17) Production Capacity=1e+09 [Unit/Month]

(18) Production Lead Time=0.5 [Month]

(19) Sales Lead Time=0.5 [Month]

(20) Sales Unit Cost=3 [Dollar/Unit]

(21) SAVEPER=TIME STEP [Month]

The frequency with which output is stored.

(22) Shipment Capacity=1e+09 [Unit/Month]

(23) Shipment Cost=1000 [Dollar/Month]

(24) Shipment Lead Time=0.5 [Month]

(25) Tariff Rate=0.3 [Dmnl]

(26) TIME STEP=1 [Month]

The time step for the simulation.

(27) Transfer Price=18 [Dollar/Unit]

(28) Unit Adjustment=1 [Unit]

(29) Unit Adjustment II=1 [Dollar/Unit]

(30) Unit coefficient=1 [Dollar/Unit]

(31) Unit Production Cost=13 [Dollar/Unit]

(32) Volume Coefficient=1 [Unit/Month]
